# Supplementary material
Source: publisher figshare collection journal article supplement (https://gsapubs.figshare.com/ndownloader/files/22399275)
Supplement: Supplementary file 1 [file 22399275]

## Supplementary Document 5

### Critical Data for Outflow Ignimbrite Cooling Units in Select Stratigraphic Sections

SUPPLEMENTARY TABLE 5-1. STRATIGRAPHIC SECTION IN CONDOR CANYON 13 KM SOUTHEAST OF PIOCHE IN THE 7.5 MINUTE CONDOR CANYON TOPOGRAPHIC QUADRANGLE AT APPROXIMATELY 37° 51' N, 114° 21' W.

| Stratigraphic unit           | Sample           | PM sample    | Thick (m) | Mode (%)                          | Age (Ma)          |
|------------------------------|------------------|--------------|-----------|-----------------------------------|-------------------|
| Hiko Tuff                    | CND-1V           | 8P385        | >85       | <u>53/20/16/7/3/0/0/&lt;1//30</u> | 18.47±0.04        |
| Harmony Hills Tuff           | CND-1U, -3       | 8P377        | 40        | <u>65/6/1/15/7/4/1/2//48</u>      | <u>22.56±0.11</u> |
| Condor Canyon Formation      |                  |              |           |                                   |                   |
| Bauers Tuff Member           | CND-1T           | 8P369        | 65        | <u>56/0/35/6/1/0/0/2//15</u>      | 23.04±0.11        |
| Swett Tuff Member            | CND-1R, -1S      | 7T668        | 10        | <u>83/0/0/12/0/0/0/5//10</u>      | <u>24.15±0.10</u> |
| Leach Canyon Formation       | CND-1P           |              | 180       |                                   | <u>24.00±0.06</u> |
| Table Butte Member           |                  | 8P361, 8P319 |           | <u>47/24/17/5/3/0/0/3//16*</u>    |                   |
| Narrows Member               |                  | 8P353, 8P311 |           | <u>32/29/30/6/1/0/0/2//17*</u>    |                   |
| Isom Formation               |                  |              |           |                                   |                   |
| Hole-in-the-Wall Tuff Member | CND-1N, -8A, -8E | 8P303, 1P143 | 80        | <u>83/0/0/0/0/4/4/8//7</u>        | 24.55±0.12        |
| Hamlight Tuff Member         |                  |              |           | <u>78/0/0/0/0/7/5/9//6</u>        |                   |
| Fourth cooling unit          | CND-8FU          | 8P295        | ~15       |                                   | 24.75±0.13        |
| Second cooling unit          | CND-1M, -8G      | 8P287        | ~70       |                                   | 24.63±0.17        |
| First cooling unit           | CND-1L, -8H      | 8P279        | 9         |                                   | 25.10±0.70        |
|                              |                  |              |           |                                   | 24.91±0.05        |
| Hornblende andesite lava     | CND-1K           |              |           |                                   |                   |
| Blawn Formation(?)           |                  |              |           |                                   |                   |
| Rhyolite tuff member         | CND-1J           |              | 65        |                                   |                   |
| Latitic lava                 |                  |              |           |                                   |                   |
| Shingle Pass Formation       |                  |              |           |                                   |                   |
| Upper Tuff Member            | CND-1G           | 7T676        | 45        | <u>56/5/28/7/1/1/&lt;1/1//8**</u> | <u>26.38±0.06</u> |
| Latitic lava                 | CND-1F           |              |           |                                   |                   |
| Isom Formation               |                  |              |           |                                   |                   |
| Bald Hills Tuff Member       |                  |              |           | <u>79/0/0/0/0/7/6/7//10</u>       |                   |
| Third cooling unit           | CND-1E, -8B, -8I | 8P327, 8P271 | ~60       |                                   | 27.25±0.09        |
| Second cooling unit          | CND-1D, -8C, -8J | 8P263        | ~30       |                                   |                   |
| First cooling unit           | CND-1C, -8D, -8K | 8P345, 8P255 | ~30       |                                   | 27.90±0.09        |
| Lund Formation               | CND-1B           | 7T660, 8P247 | 230       | <u>56/14/6/13/15/0/0/6//40</u>    | <u>29.20±0.08</u> |
| Wah Wah Springs Fm.          | CND-1A           | 7T684        | >40       | <u>59/5/0/10/19/3/0/4//32</u>     | <u>30.06±0.05</u> |
| Paleozoic rocks              |                  |              |           |                                   |                   |

Notes: See other Supplementary Documents in this article for additional information.

PM sample, paleomagnetic sample; see Gromme and Hudson ( this themed issue).

Thick, thickness in meters of the cooling unit at the site.

Mode, modal proportion (volume % of phenocrysts) are listed in the following order:

plag/qtz/sani/biot/hrnbl/cpx/opx/opaq//volume % of total phenocrysts in whole rock; if mode is underlined it is an average for unit; otherwise mode is for sample in this stratigraphic section. Mode includes trace of titanite for Hiko, Leach Canyon, and Lund.

Age, <sup>40</sup>Ar/<sup>39</sup>Ar analyses referred to Fish Canyon Tuff sanidine irradiation monitor at 28.20 Ma; see Deino ( this themed issue) for details; ± is one sigma; if age is underlined it is weighted mean for unit from Table 1; otherwise age is for the sample from this section.

SUPPLEMENTARY TABLE 5-2. STRATIGRAPHIC SECTION IN WHITE RIVER NARROWS AT APPROXIMATELY 37° 50'N, 115°W ON THE WHITE RIVER NARROWS AND WEEPAH SPRING 7.5 QUADRANGLES. SEE ALSO BEST ET AL. (1989B, P.126-128) AND DU BRAY AND HURTUBISE (1994).

| Stratigraphic unit          | Sample              | PM sample    | Thick (m) | Mode (%)                              | Age (Ma)          |
|-----------------------------|---------------------|--------------|-----------|---------------------------------------|-------------------|
| Basaltic andesite lavas     |                     |              | 0-150     |                                       | 21-18             |
| Hiko Tuff                   | WHRN-1L             | 7T796        | >27       | <u>51/10/26/8/4/0/0/2//40</u>         | <u>18.51±0.05</u> |
| Harmony Hills Tuff          |                     |              | 0-6       | <u>62/6/2/16/6/5/0/3//45</u>          | <u>22.56±0.11</u> |
| Pahrnagat Formation         | WHRN-1J             | 7T788        | 11        | <u>33/31/30/4/&lt;1/&lt;1/0/1//18</u> | <u>22.93±0.02</u> |
| Condor Canyon Formation     |                     |              |           |                                       |                   |
| Bauers Tuff Member          | WHRN-1H             | 7T772        | 26        | 42-61/0/28-46/6-8/0/1/0/3-4/14-17     | 23.04 ±0.11       |
|                             |                     | 7T780        |           |                                       | <u>24.15±0.10</u> |
| Swett Tuff Member           | WHRN-1G             | 7T764        | 10        | <u>84/0/0/15/tr/tr/0/1//10</u>        | <u>24.15±0.10</u> |
| Leach Canyon Formation      |                     |              | 104       |                                       |                   |
| Table Butte Tuff Mbr.       | WHRN-1F             | 7T756        |           | <u>46/24/17/7/2/tr/0/4//20*</u>       | 24.00±0.06        |
| Narrows Tuff Mbr.           | WHRN-1D, -1E        | 7T748        |           | <u>35/32/33/6/2/1/0/2//20*</u>        |                   |
| Isom Formation              |                     |              |           |                                       |                   |
| Hole-in-the-Wall Tuff Mbr.  | WHRN-1C             | 8P231        | 5         | 77/0/5/0/0/4/3/11//6                  | <u>24.55±0.12</u> |
| Shingle Pass Formation      |                     |              |           |                                       |                   |
| Upper Tuff Member           | WHRN-1B             | 8P222        | 20        | 53-71/<1/20-33/3-9/<2/<1/<1/<2//7-10  | <u>26.36±0.06</u> |
|                             |                     |              |           |                                       | <u>26.82±0.09</u> |
| Hancock Tuff Member         | WHRN-1A             | 8P214        | 12        | 24/33/38/3/<1/0/0/1//29               | <u>26.82±0.09</u> |
| Isom Formation              |                     |              |           |                                       |                   |
| Bald Hills Tuff Mbr.        | WHRN-2D,<br>WEEP-1D | 8P724        | 20        | <u>83/&lt;1/&lt;1/0/0/4/8/5//13</u>   | 27.36±0.12        |
| Monotony Tuff               | WHRN-2C             | 8P208        | 12        | 52/10/6/19/10/0/0/2//27               | <u>27.57±0.04</u> |
| Petroglyph Cliff Ignimbrite | WHRN-2B             | 7T732        | ~20       | <u>83/&lt;1/&lt;1/0/0/4/8/5//13</u>   | <u>29.1</u>       |
|                             | WEEP-1C             |              |           |                                       |                   |
| Lund Formation              | WHRN-2A,<br>WEEP-1B | 7T740        | ~22       | <u>56/14/6/13/15/0/0/6//40</u>        | <u>29.20±0.08</u> |
| Wah Wah Springs Fm.         | WEEP-1J             | 1P350, 0P112 | ~30       | <u>59/5/0/10/19/3/0/4//32</u>         | <u>30.06±0.05</u> |
| Paleozoic rocks             |                     |              |           |                                       |                   |

Notes: See other Supplementary Documents in this article for additional information.

PM sample, paleomagnetic sample; see Gromme and Hudson (this themed issue).

Thick, thickness in meters of the cooling unit at the site.

Mode, modal proportion (volume % of phenocrysts) are listed in the following order:

plag/qtz/sani/biot/hrnbl/cpx/opx/opaq//volume % of total phenocrysts in whole rock; if mode is underlined it is an average for unit; otherwise mode is for sample in this stratigraphic section. Mode includes trace of titanite for Hiko, Leach Canyon, and Lund.

Age, <sup>40</sup>Ar/<sup>39</sup>Ar analyses referred to Fish Canyon Tuff sanidine irradiation monitor at 28.20 Ma; see Deino (this themed issue) for details; ± is one sigma; if age is underlined it is weighted mean for unit from Table 1; otherwise age is for the sample from this section.

SUPPLEMENTARY TABLE 5-3. STRATIGRAPHIC SECTION AT THE SOUTHERN END OF THE NORTH PAHROC RANGE. A COMPLETE SECTION IS EXPOSED IN THE CENTRAL PAHROC SPRING QUADRANGLE (SCOTT ET AL., 1992) SOUTH OF THE BOULDER WASH ROAD.

| Stratigraphic unit                            | Sample   | PM sample              | Thick (m) | Mode (%)                                       | Age (Ma)          |
|-----------------------------------------------|----------|------------------------|-----------|------------------------------------------------|-------------------|
| Hiko Tuff                                     | PAHRC-1R | 1P425,<br>1P430, 1P435 | 30        | <u>51/10/26/8/4/0/0/2//40</u>                  | 18.56±0.04        |
| Harmony Hills Tuff                            | PAHRC-1Q | 1P264                  | 30        | <u>62/6/2/16/6/5/0/3//45</u>                   | <u>22.56±0.11</u> |
| Pahranagat Formation                          | PAHRC-1S | 1P256                  | >10       | <u>33/31/30/4/&lt;1/&lt;1/0/1//18</u>          | <u>22.93±0.02</u> |
| Condor Canyon Formation                       |          |                        |           |                                                |                   |
| Bauers Tuff Member                            | PAHRC-1P | 1P248                  | 60        | <u>49/0/44/6/0/&lt;1/0/1//15</u>               | <u>23.04±0.11</u> |
| Isom-type tuff of<br>Pahroc Valley            | PAHR-1N  | 1P240                  | 5-10      | <u>83/&lt;1/&lt;1/0/0/4/8/5//13</u>            |                   |
| Condor Canyon Formation                       |          |                        |           |                                                |                   |
| Swett Tuff Member                             | PAHRC-1M | 1P232                  | 20        | <u>84/0/0/15/tr/tr/0/1//10</u>                 | <u>24.15±0.10</u> |
| Leach Canyon Formation                        |          |                        |           |                                                | <u>24.00±0.06</u> |
| Table Butte Tuff Mbr.                         | PAHRC-1L |                        | 70        | <u>46/24/17/7/2/tr/0/4//20*</u>                |                   |
| Narrows Tuff Member                           | PAHRC-1K | 1P225                  | 30        | <u>35/32/33/6/2/1/0/2//20*</u>                 |                   |
| Isom Formation                                |          |                        |           |                                                |                   |
| Hole-in-the-Wall Tuff Mbr.                    | PAHRC-1J | 1P216                  | 14        | <u>83/&lt;1/&lt;1/0/0/4/8/5//13</u>            | <u>24.55±0.12</u> |
| Hamlight Tuff Mbr.,<br>upper                  | PAHRC-1H | 2P123                  | 15        | <u>83/&lt;1/&lt;1/0/0/4/8/5//13</u>            | <u>24.7</u>       |
| lower                                         | PAHRC-1G | 1P200                  | 15        | <u>83/&lt;1/&lt;1/0/0/4/8/5//13</u>            |                   |
| Andesitic lava flows                          | PAHRC-1F |                        | ~45       |                                                |                   |
| Orphan tuff                                   |          |                        | 50        | 52/25/11/7/4/0/0/1//25                         |                   |
| Shingle Pass Formation                        |          |                        |           |                                                |                   |
| Upper Tuff Member                             | PAHRC-1D | 1P191                  | 50        | 54/0/32/9/2/0/0/3//7                           | <u>26.36±0.06</u> |
| Hancock Tuff Member                           | PAHRC-1C |                        | 56        | 25/38/31/4/1/0/0/1//29                         | <u>26.82±0.09</u> |
| Lower Tuff Member                             | PAHRC-1B | 1P182                  | 60        | 31/8/56/<1/0/2/1/1//14                         | <u>27.16±0.06</u> |
| Isom Formation                                |          |                        |           |                                                |                   |
| Bald Hills Tuff Mbr., upper                   | PAHRC-1A | 8P239                  | 18        | <u>83/&lt;1/&lt;1/0/0/4/8/5//13</u>            | <u>27</u>         |
| Limestone                                     |          |                        |           |                                                |                   |
| Monotony Tuff                                 | PAHRC-2G | 2P115                  | <40       | <u>59/13/5/14/4/3/&lt;1/2//34</u>              | <u>27.57±0.04</u> |
| Isom Formation                                |          |                        |           |                                                |                   |
| Bald Hills Tuff Mbr., lower                   | PAHRC-2F | 2P107                  | ~15       | <u>83/&lt;1/&lt;1/0/0/4/8/5//13</u>            | <u>27</u>         |
| Limestone                                     |          |                        |           |                                                |                   |
| Isom-type tuff                                | PAHRC-2E | 2P099                  | 30        |                                                |                   |
| Petroglyph Cliff Ignimbrite                   | PAHRC-2D | 2P091                  | 30-60     | <u>83/&lt;1/&lt;1/0/0/4/8/5//13</u>            | <u>29.1</u>       |
| Limestone and conglomerate of Paleozoic rocks |          |                        |           |                                                |                   |
| Lund Formation                                | PAHRC-2C | 2P083                  | ~105      | 45-60/10-25/<5/10/10-15/<5/0/2//30-50          | <u>29.20±0.08</u> |
| Limestone and conglomerate of Paleozoic rocks |          |                        |           |                                                |                   |
| Wah Wah Springs Fm.                           | PAHRC-2B | 2P074                  | >110      | <u>59/5/0/10/19/3/0/4//32</u>                  | <u>30.06±0.05</u> |
| Limestone and conglomerate of Paleozoic rocks |          |                        |           |                                                |                   |
| Cottonwood Wash Tuff                          | PAHRC-2A | 2P066                  | 30        | <u>55.6/11.6/2.6/12.2/12.1/0.8/0/5.1//39.1</u> | <u>31.13±0.09</u> |
| Limestone and conglomerate of Paleozoic rocks |          |                        |           |                                                |                   |
| Paleozoic rocks                               |          |                        |           |                                                |                   |

Notes: See other Supplementary Documents in this article for additional information.

PM sample, paleomagnetic sample; see Gromme and Hudson (this themed issue).

Thick, thickness in meters of the cooling unit at the site.

Mode, modal proportion (volume % of phenocrysts) are listed in the following order:

plag/qtz/sani/biot/hrnbl/cpx/opx/opaq//volume % of total phenocrysts in whole rock; if mode is underlined it is an average for unit; otherwise mode is for sample in this stratigraphic section. Mode includes trace of titanite for Hiko, Leach Canyon, and Lund and 1-2 % altered Fe-rich olivine for the Lower Tuff Member of the Shingle Pass Formation.

Age, <sup>40</sup>Ar/<sup>39</sup>Ar analyses referred to Fish Canyon Tuff sanidine irradiation monitor at 28.20 Ma; see Deino (this themed issue) for details; ± is one sigma; if age is underlined it is weighted mean for unit from Table 1; otherwise age is for the sample from this section.
